# Supplementary material for: Benefits of applying molecular barcoding systems are not uniform across different genomic applications
Source: J Transl Med. 2023 May 5;21:305. doi: 10.1186/s12967-023-04160-0 (PMC10163729; doi:10.1186/s12967-023-04160-0)
Supplement: Supplementary file 1 — Additional file 1. Supplementary Table 1. [file 12967_2023_4160_MOESM1_ESM.xlsx]

## Sheet: Sheet1
Experiment	Description	Input type	preparation	Input amount	data in figures	library_ID
Variant calling performance	Mixes were prepared from 3 types of input material (FF, FFPE, cfDNA) of GM12891 and GM12892 to yield VAF of GM12892-specific variants ranging from 0.05-2%,mixes were used to prepare sequencing libraries; libraries were subsequently captured with the RD_SSPD panel, targeting 110 variants present in GM12892 and absent from GM12891, and sequenced with NovaSeq	GM12891 and GM12892, FFPE DNA	FFPE DNA of 2 cell lines was mixed at various ratios (0.05%-2%). Sequencing libraries were prepared with KAPA Hyperplus library prep using sequencing adapters bearing dsUMIs. Libraries underwent hybridization capture with a panel targeting 110 genomic loci with known variants.	25 ng	4C	TS-FFPE1d-005-a
				25 ng	4C	TS-FFPE1d-005-b
				25 ng	4C	TS-FFPE1d-01-a
				25 ng	4C	TS-FFPE1d-01-b
				25 ng	1D, 4C	TS-FFPE1d-02-a
				25 ng	1D, 4C	TS-FFPE1d-02-b
				25 ng	4A, 4C, 4E	TS-FFPE1d-05-a
				25 ng	4A, 4C	TS-FFPE1d-05-b
				25 ng	4C	TS-FFPE1d-1-a
				25 ng	4C	TS-FFPE1d-1-b
				25 ng	4C	TS-FFPE1d-2-a
				25 ng	4C	TS-FFPE1d-2-b
		GM12891 and GM12892, cfDNA	Artificial cell-free DNA of 2 cell lines was mixed at various ratios (0.05%-2%). Sequencing libraries were prepared with KAPA Hyperplus library prep using sequencing adapters bearing dsUMIs. Libraries underwent hybridization capture with a panel targeting 110 genomic loci with known variants.	12.5 ng	4C	TS-actDNA-005-a
				12.5 ng	4C	TS-actDNA-005-b
				12.5 ng	4C	TS-actDNA-01-a
				12.5 ng	4C	TS-actDNA-01-b
				12.5 ng	1D, 4B, 4C	TS-actDNA-02-a
				12.5 ng	1D, 4B, 4C	TS-actDNA-02-b
				12.5 ng	2D, 4A, 4C, 4E	TS-actDNA-05-a
				12.5 ng	2D, 4A, 4C	TS-actDNA-05-b
		GM12891 and GM12892, FF DNA	Fresh-frozen derived DNA of 2 cell lines was mixed at various ratios (0.05%-2%). Sequencing libraries were prepared with KAPA Hyperplus library prep using sequencing adapters bearing dsUMIs. Libraries underwent hybridization capture with a panel targeting 110 genomic loci with known variants.	100 ng	4C	TS-FF-005-a
				100 ng	4C	TS-FF-005-b
				100 ng	4C	TS-FF-01-a
				100 ng	4C	TS-FF-01-b
				100 ng	1D, 4C	TS-FF-02-a
				100 ng	1D, 4C	TS-FF-02-b
				100 ng	4A, 4C, 4E	TS-FF-05-a
				100 ng	4A, 4C	TS-FF-05-b
Input material characterization	3 types of input material (FF, FFPE, cfDNA) prepared from DNA of GM12891, various input amounts used to prepare sequencing libraries; libraries were subsequently captured with the RD_SSPD panel and sequenced with NovaSeq	GM12891, FFPE DNA	Cell pelet was treated with formaldehyde for 1, 3 or 5 days. DNA was isolated and sequencing libraries were prepared with KAPA Hyperplus library prep using sequencing adapters bearing dsUMIs. Libraries underwent hybridization capture with a panel targeting 110 genomic loci with known variants.	100 ng	3B, 3C, 3D, 4E	FFPE_SG057_1d_100
				10 ng	3B, 3C, 3D, 4E	FFPE_SG057_1d_10a
				10 ng	3B, 3C, 3D, 4E	FFPE_SG057_1d_10b
				20 ng	3B, 3C, 3D, 4E	FFPE_SG057_1d_20
				50 ng	3B, 3C, 3D, 4E	FFPE_SG057_1d_50
				5 ng	3B, 3C, 3D, 4E	FFPE_SG057_1d_5a
				5 ng	3B, 3C, 3D, 4E	FFPE_SG057_1d_5b
		GM12891, cfDNA	Artificial cell-free DNA was prepared by treating the cell pelet with Atlantis dsDNase. Sequencing libraries were prepared with KAPA Hyperplus library prep using sequencing adapters bearing dsUMIs. Libraries underwent hybridization capture with a panel targeting 110 genomic loci with known variants.	10 ng	3B, 3C, 3D, 4E	actDNA_SG057_10a
				10 ng	3B, 3C, 3D, 4E	actDNA_SG057_10b
				20 ng	3B, 3C, 3D, 4E	actDNA_SG057_20
				5 ng	3B, 3C, 3D, 4E	actDNA_SG057_5a
				5 ng	3B, 3C, 3D, 4E	actDNA_SG057_5b
		GM12891, FF DNA	DNA was isolated from the cells and sequencing libraries were prepared with KAPA Hyperplus library prep using sequencing adapters bearing dsUMIs. Libraries underwent hybridization capture with a panel targeting 110 genomic loci with known variants.	100 ng	3B, 3C, 3D, 4E	FF_SG057_100a
				10 ng	3B, 3C, 3D, 4E	FF_SG057_10a
				10 ng	3B, 3C, 3D, 4E	FF_SG057_10b
				50 ng	3B, 3C, 3D, 4E	FF_SG057_50
				5 ng	3B, 3C, 3D, 4E	FF_SG057_5a
				5 ng	3B, 3C, 3D, 4E	FF_SG057_5b
